# Supplementary material for: Plasmon-induced charge separation and accumulation in Ag 2 S/Cu 2− x S S-scheme junction for broad-spectrum photothermal-assisted photocatalysis
Source: Royal Society of Chemistry journal article supplement (doi:10.1039/d5ta08533k), 2026-01-01
Supplement: d5ta08533k1.pdf [file d5ta08533k1.pdf]

## Supporting Information

### Plasmon-induced Charge Separation and Accumulation in Ag<sub>2</sub>S/Cu<sub>2-x</sub>S S-Scheme Junction for Wide-Light-Driven Photothermal-Assisted Photocatalysis

*Wen-Xi Xia<sup>a</sup>, Yi-Xin Dong<sup>a</sup>, Zhe-Yuan Chen<sup>a</sup>, Hai-Ting Li<sup>a</sup>, You-Long Chen<sup>b</sup>, Qing-Bo Liu<sup>a</sup>, Si-Jing Ding<sup>c</sup>, Qu-Quan Wang<sup>\*d, e</sup>, Liang Ma<sup>a \*</sup>*

<sup>a</sup> Hubei Key Laboratory of Optical Information and Pattern Recognition, Wuhan Institute of Technology, Wuhan, 430205, P. R. China.

<sup>b</sup> State Key Laboratory of Pulsed Power Laser Technology, National University of Defense Technology, Hefei 230037, P. R. China.

<sup>c</sup> School of Mathematics and Physics, China University of Geosciences (Wuhan), Wuhan, 430074, P. R. China.

<sup>d</sup> Guangdong Provincial Key Laboratory of Advanced Thermoelectric Materials and Device Physics, Southern University of Science and Technology, Shenzhen, 518055, P. R. China.

<sup>e</sup> Quantum Science Center of Guangdong–Hong Kong–Macao Greater Bay Area (Guangdong), Shenzhen 518045, China

### Experimental Section

#### 1. Photocatalytic measurements

The photocatalytic hydrogen production measurement was conducted in a commercial test system (Labsolar-6A, Beijing Perfect Light). Typically, 20 mg of photocatalyst and 50 mL of sacrificial reagent Na<sub>2</sub>S (0.35 M) and Na<sub>2</sub>SO<sub>3</sub> (0.25 M) aqueous solution were added to a quartz reactor. The light source was a 300 W Xenon lamp equipped with a filter (> 420 nm). In the photocatalytic measurements, hydrogen was collected and detected by an on-line GC-9790 gas chromatograph equipped with a thermal conductivity detector, which Argon was used as the carrier gas. The apparent quantum efficiency (AQE) was tested with different irradiation light by using various quartz bandpass filters. A Ray virtual radiation actinometer was used to record the luminous flux of incident light.

## 2. Photoelectrochemical measurements

Photoelectrochemical measurements were used by CHI660 electrochemical workstation with a three-electrode cell. The photoanodes were made by coating photocatalysts on a FTO glass. Particularly, 20 mg of catalyst powder and 20 mg polyethylene glycol were added into 2 mL of ethanol to form a slurry. Then, the slurry was coated on a 2 cm × 1 cm FTO glass via a scraping coating method, which the active area of the electrode was kept as 1 cm × 1 cm. The coated electrode was dried at 200 °C in argon flow for 0.5 h. In the photoelectrochemical tests, the 1 cm × 1 cm Pt electrode was used counter electrode, and an Ag/AgCl electrode was used as the reference electrode. 0.5 M Na<sub>2</sub>SO<sub>4</sub> aqueous solution was used as the electrolyte, and 300 W Xenon lamp was served as the simulated solar energy source. Electrochemical impedance spectroscopy (EIS) was acquired in dark under alternative current voltage (10 mV). It was tested with a direct current bias of 0.6 V against Ag/AgCl with a frequency range of 10<sup>-1</sup> to 10<sup>5</sup> Hz.

## 3. Photothermal measurement

The photothermal measurement of as-prepared powder were carried out as follows, 40 mg of sample was loaded on a white paper and initial temperature was controlled at room temperature (27 °C). A 300 W Xenon lamp (100 mW/cm<sup>2</sup>) was used as a light source. The temperature of the sample was measured using the infrared (IR) thermal camera. The photothermal measurements of as-prepared aqueous samples were carried out in the cuvette, and the temperature of sample was measured using the IR thermal camera and thermocouple. To evaluate the photothermal conversion of Ag<sub>2</sub>S/Cu<sub>2-x</sub>S, the aqueous solution (1.3 mL, 100 µg/mL) was irradiated by an 808 nm laser (1.0 W/cm<sup>2</sup>). The temperature variation of the different samples was continuously monitored by an infrared (IR) thermal camera and thermocouple. The photothermal conversion efficiency (PCE) was calculated by the formula:

$$\eta = \frac{hs(T_{\max} - T_{\text{sur}}) - Q_{\text{dis}}}{I(1 - 10^{-A_{\lambda}})} \quad (1)$$

where  $h$  and  $s$  are the heat transfer coefficient and surface area of the container.  $T_{\max}$ ,  $T_{\text{sur}}$ , and  $Q_{\text{dis}}$  are the maximum steady-state temperature, temperature of the surroundings, heat generated by the water and quartz cell under laser irradiation, respectively.  $I$  and  $A_{\lambda}$  are the incident laser intensity and absorbance at excitation wavelength, respectively.

Moreover, formula (2) was used.

$$hs = \frac{m_{\text{H}_2\text{O}} C_{\text{H}_2\text{O}}}{\tau_s} \quad (2)$$

where  $m_{H_2O}$  are the total mass of  $H_2O$ ,  $C_{H_2O}$  denotes the specific heat capacity of  $H_2O$ , and  $\tau_s$  is the time constant of  $Ag_2S/Cu_{2-x}S$ .

Then, formula (3) was used for the cooling period (i.e., after removing the 808 nm light source).

$$t = -\tau_s \times \ln \theta = -\ln \frac{T - T_{surr}}{T_{max} - T_{surr}} \quad (3)$$

where  $T_{max}$  is the highest steady-state temperature of  $Ag_2S/Cu_{2-x}S$ ,  $T_{surr}$  is the ambient temperature,  $T$  represents the real-time temperature. Thus, the time constant quantity was calculated from the linear regression curve in cooling period of  $Ag_2S/Cu_{2-x}S$ .

#### 4. TAS measurements

TAS measurements were performed on a pump-probe system (Femto-TA100), and all experiments were performed at  $\sim 24$  °C. The aqueous solution samples (1 mg/mL), including  $Ag_2S$ ,  $Cu_{2-x}S$ , and  $Ag_2S/Cu_{2-x}S$  were deposited on quartz glasses (1 x 1 cm) and dried at 70 °C for further tests. The fundamental pulses were produced by a Ti: sapphire laser from Coherent (Astrella, 800 nm, 35 fs, 7 mJ/pulse, and 1 kHz repetition). The fundamental beam was focused into a  $CaF_2$  or YAG crystal to produce a white light continuum probe beam with a time window limit of 3 ns. A fraction of the fundamental beam was utilized to generate the 400 nm pump beam through the optical parametric amplifier.

#### 5. Sample Characterization

Transmission electron microscopy (TEM) and high-resolution TEM (HRTEM) measurements were performed on Talos F200S instruments. Scanning electron microscopy (SEM) characterization was performed on GeminiSEM 300. X-ray photoelectron spectroscopy (XPS) measurement was performed on Thermo Scientific ESCALAB Xi+ system. X-ray diffraction (XRD) was measured by a Bruker D8 ADVANCE X-ray diffractometer with  $Cu K\alpha$  radiation. UV-Vis-NIR absorption spectra were recorded on spectrophotometer (lambda 1050). *In-situ* surface potential images were conducted at an atomic force microscopy (Bruker Dimension Icon, German) operating in KPFM mode.

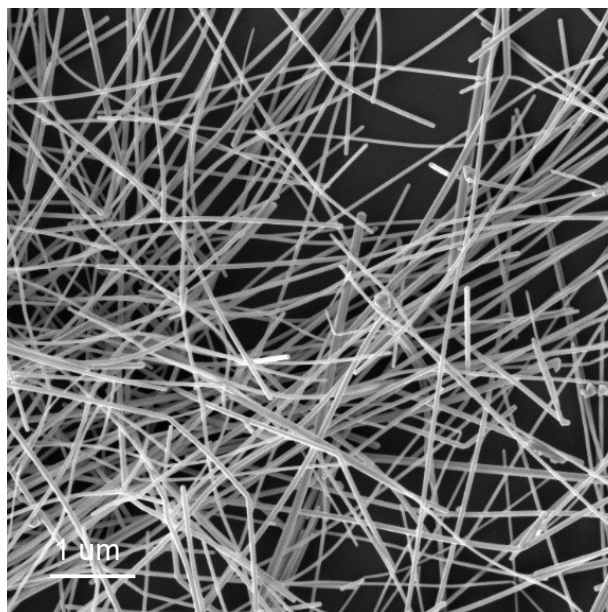

**Figure S1.** Low-magnification SEM image of Ag nanowires.

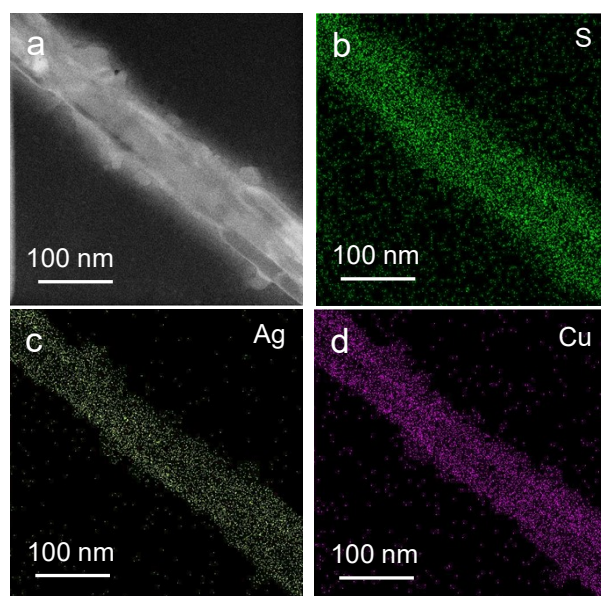

**Figure S2.** High-angle annular dark-field scanning TEM (HAADF-STEM) and energy-dispersive X-ray spectroscopy (EDS) mappings of  $\text{Ag}_2\text{S}/\text{Cu}_{2-x}\text{S}$  heterostructures.

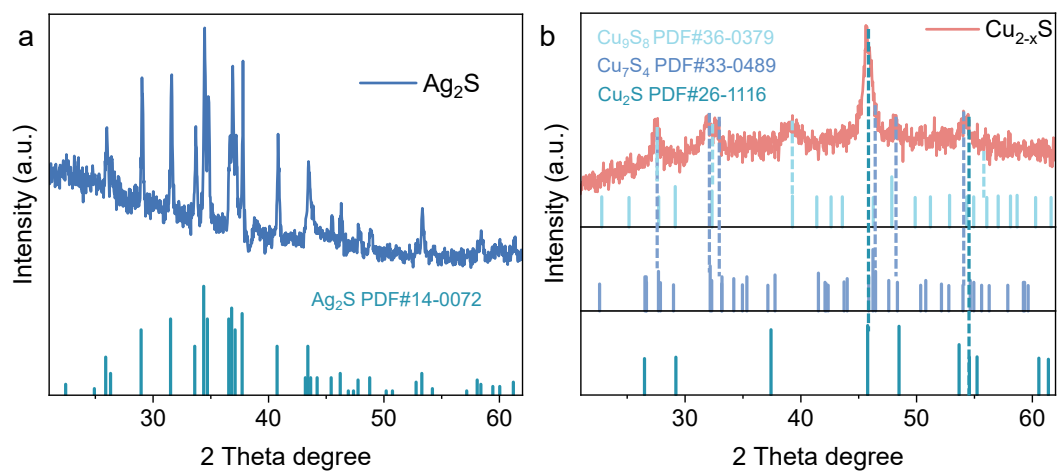

**Figure S3.** XRD patterns of the  $\text{Ag}_2\text{S}$  (a) and  $\text{Cu}_{2-x}\text{S}$  (b).

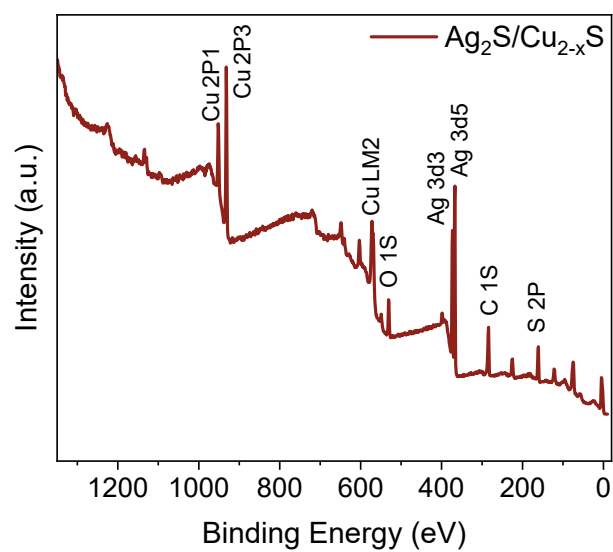

**Figure S4.** XPS survey of  $\text{Ag}_2\text{S}/\text{Cu}_{2-x}\text{S}$  nanotubes.

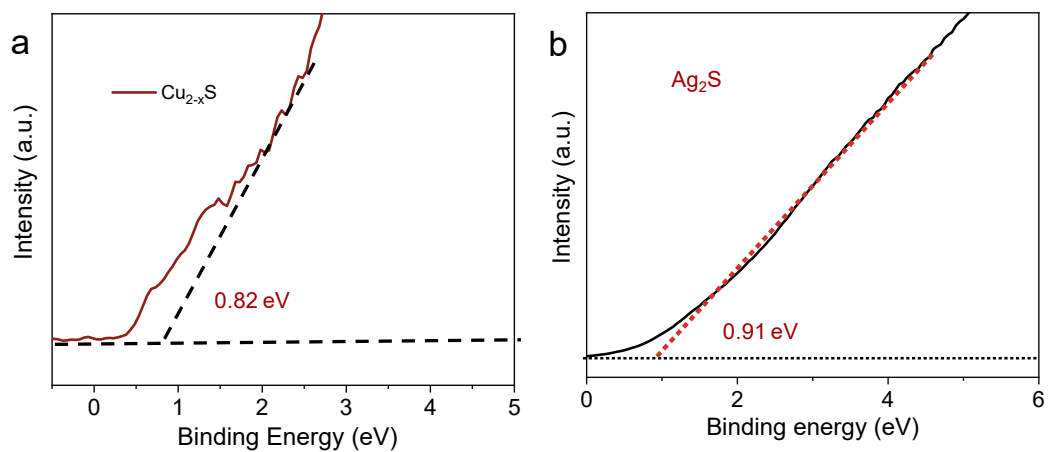

**Figure S5.** Valence band with respect to the Fermi level for  $\text{Cu}_{2-x}\text{S}$  (a) and  $\text{Ag}_2\text{S}$  (b).



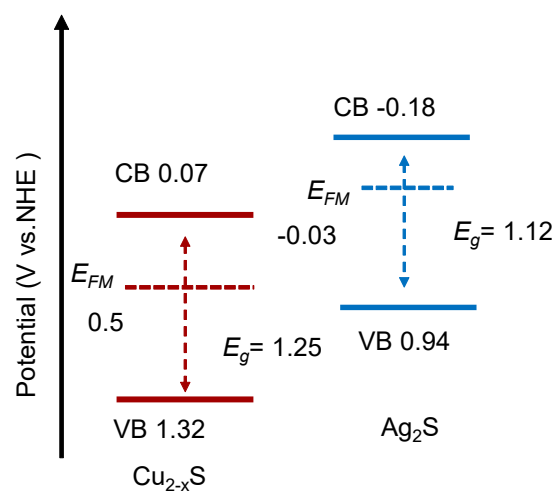

**Figure S6.** Calculated band structures for  $\text{Ag}_2\text{S}$  and  $\text{Cu}_{2-x}\text{S}$  based on the UPS and DRS results (vs. NHE).

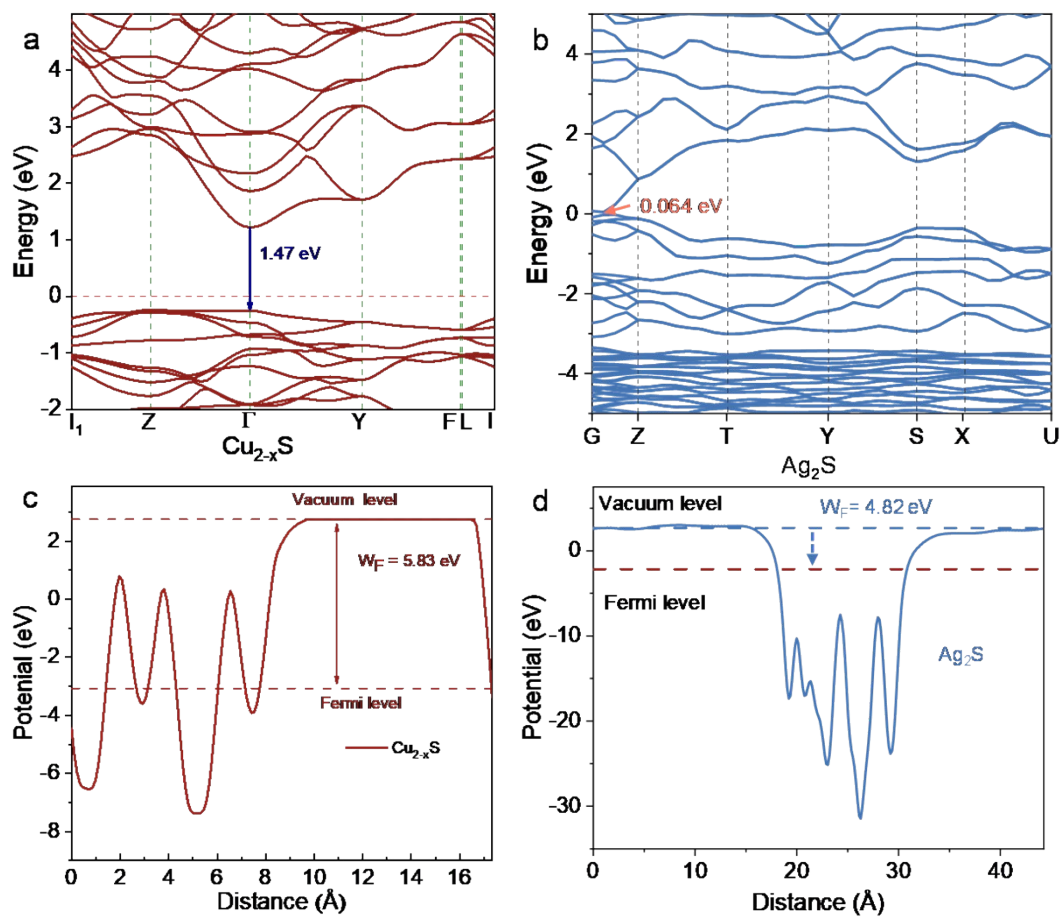

**Figure S7.** Calculated band structures (a, b) and Fermi levels (c, d) via DFT for  $\text{Ag}_2\text{S}$  and  $\text{Cu}_{2-x}\text{S}$ .

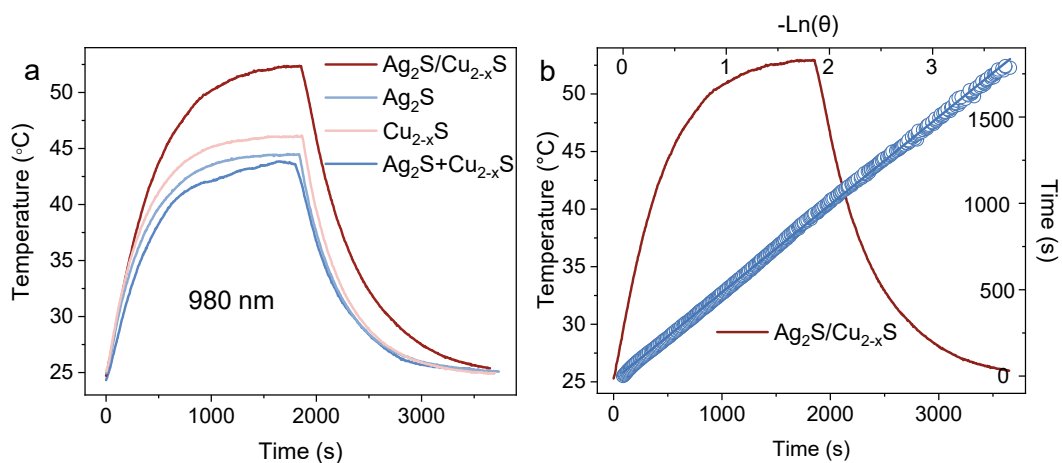

**Figure S8.** Photothermal heating curves for  $\text{Ag}_2\text{S}/\text{Cu}_{2-x}\text{S}$  and components under a 980 nm laser ( $1.0 \text{ W}/\text{cm}^2$ ) irradiation. The time constant and PCE are calculated as 483.84 s and 48.57%, respectively.

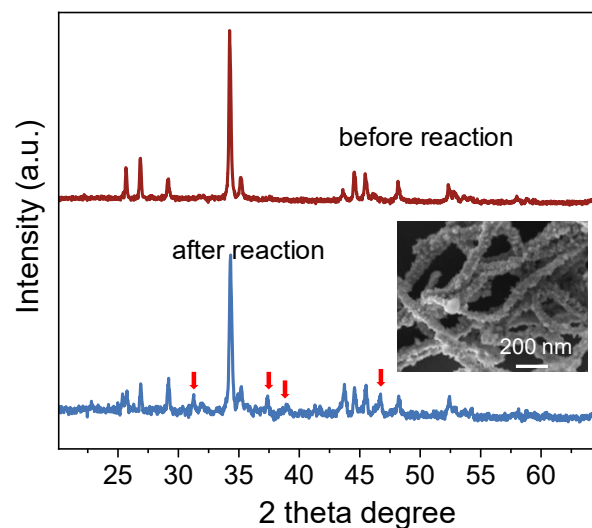

**Figure S9.** XRD patterns of  $\text{Ag}_2\text{S}/\text{Cu}_{2-x}\text{S}$  nanotubes before and after reaction, the insert is the SEM image of  $\text{Ag}_2\text{S}/\text{Cu}_{2-x}\text{S}$  nanotubes after reaction. The new peaks (labeled with red arrows) at  $31.3^\circ$ ,  $37.4^\circ$ ,  $38.9^\circ$ , and  $46.9^\circ$  can be assigned to the  $(-112)$ ,  $(013)$ ,  $(-103)$ , and  $(004)$  phases of  $\text{Ag}_2\text{S}$ .

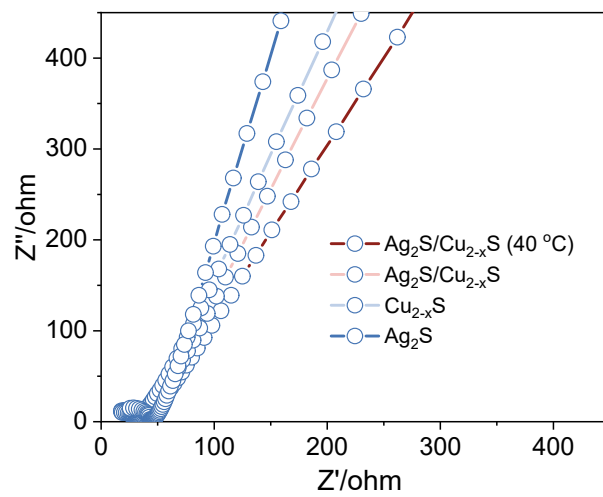

**Figure S10.** EIS plots of  $\text{Ag}_2\text{S}/\text{Cu}_{2-x}\text{S}$  and components tested at 5 and 40 °C.

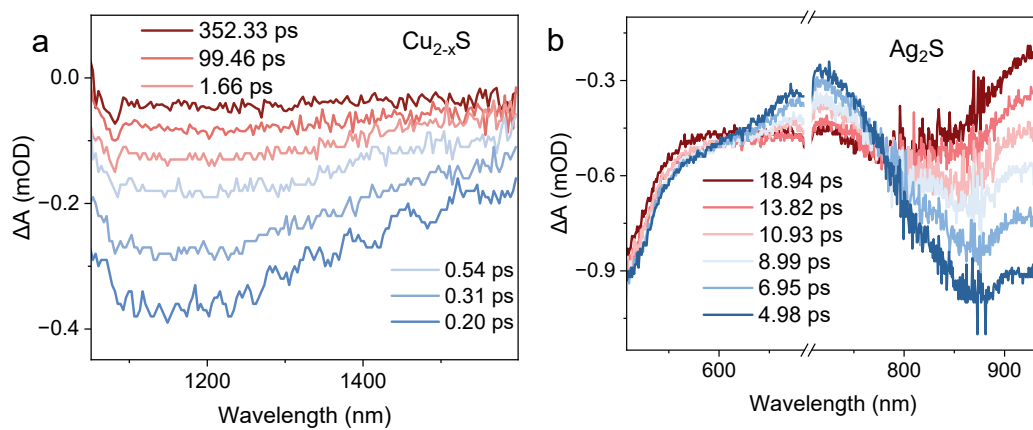

**Figure S11.** TA spectra of  $\text{Cu}_{2-x}\text{S}$  (a) in the region of 1050-1640 nm) and  $\text{Ag}_2\text{S}$  (b) in the region of 500-900 nm.

**Table S1.** Comparison of the photothermal conversion performance of defective  $\text{Ag}_2\text{S}/\text{Cu}_{2-x}\text{S}$  with similar materials.

| Materials                                                  | PCE (%) | Reference |
|------------------------------------------------------------|---------|-----------|
| $\text{Ag}_2\text{S}/\text{Cu}_{2-x}\text{S}$              | 48.6    | This work |
| $\text{Ag}_2\text{S}$ NPs                                  | 38.5    | (1)       |
| $\text{Ag}-\text{Ag}_2\text{S}$                            | 34.1    | (2)       |
| BSA- $\text{Ag}_2\text{S}$                                 | 18.9    | (3)       |
| $\text{Ag}_2\text{S}@ \text{MSN-TGF}$                      | 38.2    | (4)       |
| $\text{Cu}_x\text{S}-\text{Ag}_2\text{S}$                  | 48.6    | (5)       |
| $\text{Ag}_{2-x}/\text{Cu}_x\text{S}$                      | 44.0    | (6)       |
| $\text{Ag}_2\text{S}@ \text{WS}_2$                         | 33.0    | (7)       |
| $\text{Fe}_3\text{O}_4@ \text{Cu}_{2-x}\text{S}$           | 34.1    | (8)       |
| $\text{Cu}_{2-x}\text{S}/\text{CdS}/\text{Bi}_2\text{S}_3$ | 31.0    | (9)       |
| $\text{Cu}_{2-x}\text{S}-\text{PEG}@ \text{HA}$            | 30.5    | (10)      |

## References

- [1] S. Zhu, W. Song, Y. He, Y. Wang, X. Li, Y. Wu, X. Meng, C. Lin, W. Wang, H. Wang, S. Huang, *ACS Appl. Mater. Interfaces* 2025, 17, 37465.
- [2] P. Zang, Y. Du, C. Yu, D. Yang, S. Gai, L. Feng, J. Lin, *Chem. Mater.* 2023, 35(18), 7770-7780.
- [3] J. Zhao, Q. Zhang, W. Liu, G. Shan, X. Wang, *Colloid Surface. B.* 2022, 211, 112295.
- [4] W. Li, S. Liu, S. Dong, S. Gai, F. Zhang, Y. Dong, D. Yang, F. He, L. Zhong, P. Yang, *Chem. Eng. J.* 2021, 405, 127027.
- [5] P. Zang, C. Yu, R. Zhang, D. Yang, S. Gai, B. Liu, J. Lin, *Adv. Mater.* 2024, 36(24), 2400416.
- [6] Y. Zhao, M. Song, X. Yang, J. Yang, C. Du, G. Wang, J. Yi, G. Shan, D. Li, L. Liu, D. Yan, *Chem. Eng. J.* 2020, 399, 125777.
- [7] Y. Lin, D. Han, Y. Li, L. Tan, X. Liu, Z. Cui, X. Yang, Z. Li, Y. Liang, S. Zhu, S. Wu, *ACS Sustainable Chem. Eng.* 2019, 7, 14982.
- [8] B. Wang, T. Peng, Z. Jiang, L. Shen, J. Dong, Z. Song, J. Qu, X. Dai, *Talanta*, 2025, 284, 127189.
- [9] M. Guo, T. Zhao, Z. Xing, Y. Qiu, K. Pan, Z. Li, S. Yang, W. Zhou, *ACS Appl. Mater. Interfaces* 2020, 12, 40328.
- [10] X. Gao, M. Wei, D. Ma, X. Yang, Y. Zhang, X. Zhou, L. Li, Y. Deng, W. Yang, *Adv. Funct. Mater.* 2021, 31, 2106700.
